# Supplementary material for: Control of inorganic and organic phosphorus molecules on microbial activity, and the stoichiometry of nutrient cycling in soils in an arid, agricultural ecosystem
Source: PeerJ. 2024 Sep 23;12:e18140. doi: 10.7717/peerj.18140 (PMC11426319; doi:10.7717/peerj.18140)
Supplement: Supplemental Information 1 — All biogeochemical data for all treatments of experiments. [file peerj-12-18140-s001.xlsx]

## Sheet: Hoja1
Post-incubation
Treatment	pH	moisture (%)	DOC	DON	DOP	Cmic	Nmic	Pmic	NH4	NO3	HPO4	DOC:DON	DOC:DOP	DON:DOP	Cmic:Nmic	Cmic:Pmic	Nmic:Pmic	dDOC	dDON	dDOP	dCMIC	dNMIC	dPMIC	dNH4	dNO3	dPO4	Phm	Phd	phytase	NAG	BG	POX	SEA Phm	SEA Phd	SEA phytase	SEA NAG	SEA BG	SEA POX	CO2-C	qCO2	TER C:P	lnTER C:P	TER C:N	lnTER C:N	CUE C:P	CUE C:N	CUE
control	8.43	34.3558	224.713	0.818555	0.12733	1529.23	30.6366	3.80841	0	51.8629	10.0542	274.524	1764.81	6.42859	49.9153	401.541	8.04444	201.12	-0.27686	0.02247	369.112	-60.8046	0.188881	0	38.7109	1.04764	0.0337046	0.262896	0.785239	0.0393221	0.0947942	0.244358	0.0220402	0.171914	0.513486	0.0257136	0.0619881	0.159792	754.151	0.493157	563.636	6.33441	1647.4	7.40695	0.352336	0.0779374	0.165711
control	8.12	33.8983	220.132	1.04284	0.0480927	1167.23	41.3691	3.78205	0	31.9432	5.21923	211.09	4577.25	21.6839	28.2149	308.622	10.9383	185.912	-2.24227	-0.0554916	-696.471	-25.6837	-3.36893	0	17.4876	1.58046	0.00446284	0.220911	0.779804	0.0278928	0.0815864	0.326345	0.00382346	0.189262	0.668084	0.0238967	0.0698977	0.279591	744.975	0.661095	493.583	6.20169	1119.54	7.02067	0.162049	0.050188	0.0901828
control	8.17	33.0189	122.091	0.754441	0.192321	1380.16	76.4542	3.73239	0	71.5276	5.1507	161.829	634.829	3.92283	18.0521	369.778	20.484	98.6055	-1.61443	-0.343958	221.712	7.71579	-3.41672	0	50.8	4.19775	0.0001	0.244436	0.513044	0.0001	0.0557413	0.251868	7.24556E-05	0.177107	0.371729	7.24556E-05	0.0403877	0.182492	736.459	0.533604	372.412	5.92	2282.81	7.73316	0.501253	0.0140073	0.0837927
control	7.78	33.0508	129.916	0.886245	0.125091	1107.31	51.4671	7.72588	0	56.289	6.27342	146.592	1038.57	7.08481	21.5149	143.324	6.66165	106.37	0.207443	-0.121412	1.92953	-10.0223	4.17001	0	42.8026	4.5418	0.0396572	0.14541	2.3098	0.0001	0.156976	0.413096	0.035814	0.131318	2.08596	9.03091E-05	0.141764	0.373063	716.053	0.64666	533.765	6.27996	2860.38	7.95871	0.147247	0.0174273	0.0506568
control	7.85	33.6283	124.417	0.182809	0.131406	1233.01	22.8232	3.76667	0	49.0872	4.972	680.586	946.814	1.39117	54.0244	327.348	6.05926	88.0872	-0.588236	-0.255083	571.256	-40.5251	0.0312715	-1.08092	36.1302	3.44599	0.00444469	0.186677	1.03551	0.0277793	0.0395855	0.279182	0.00360474	0.151399	0.839822	0.0225297	0.0321048	0.226423	743.508	0.603002	300.842	5.70659	1045.68	6.95242	0.460523	0.0600097	0.16624
MAP	8.21	33.5052	100.325	0.507307	0.345838	1261.03	39.6949	11.2791	0	80.9612	21.9386	197.76	290.093	1.46689	31.768	111.802	3.51934	76.7317	-0.588107	0.240977	100.908	-51.7463	7.65954	0	67.8092	12.9321	0.00443646	0.133094	1.29199	0.0221823	0.0207959	0.395122	0.00351813	0.105544	1.02455	0.0175906	0.0164912	0.313333	829.987	0.658182	105.141	4.65531	13.1388	2.57557	0.500474	0.151092	0.274987
MAP	8.15	32.8829	87.8729	0.490685	0	942.962	35.5193	7.44966	0.0212763	61.3927	9.296	179.082	NA	NA	26.5479	126.578	4.7679	53.6531	-2.79442	NA	-920.734	-31.5336	0.298684	0.0212763	46.9371	5.65723	0.0001	0.191197	0.0001	0.035712	0.0638696	0.0370856	0.000106049	0.202762	0.000106049	0.0378722	0.0677329	0.0393288	844.86	0.895966	258.428	5.55462	20.4492	3.01794	NA	0.0857619	NA
MAP	8.17	31.25	135.434	0.246303	0.222979	1048.13	48.8979	25.4545	0	90.8436	18.9113	549.869	607.387	1.1046	21.4352	41.1767	1.92099	111.949	-2.12257	-0.3133	-110.31	-19.8405	18.3054	0	70.116	17.9583	0.0278911	0.173783	0.249922	0.016091	0.0824663	0.156887	0.0266102	0.165802	0.238444	0.015352	0.0786791	0.149682	861.282	0.821732	102.551	4.63036	47.5981	3.86279	0.150227	0.0089908	0.0367513
MAP	7.93	30.8219	62.5118	0.961769	0.560696	846.34	44.9547	21.6832	0	73.665	14.0824	64.9967	111.49	1.71531	18.8265	39.0321	2.07325	38.9652	0.282967	0.314193	-259.039	-16.5348	18.1273	0	60.1786	12.3507	0.0703623	0.153518	0.0001	0.0373133	0.081956	0.211886	0.0831371	0.18139	0.000118156	0.0440879	0.0968358	0.250356	798.834	0.943869	87.662	4.47349	18.078	2.8947	0.394007	0.124336	0.221335
MAP	7.95	33.7143	89.5785	0.665805	0.377286	1036.59	24.0262	11.3147	0	39.1487	11.8539	134.542	237.429	1.76472	43.1442	91.6148	2.12346	53.2486	-0.105241	-0.00920338	374.835	-39.3221	7.57926	-1.08092	26.1917	10.3279	0.0133514	0.206946	0.77764	0.0222523	0.0438092	0.104308	0.0128801	0.199641	0.75019	0.0214668	0.0422628	0.100626	821.772	0.792765	112.414	4.72219	37.387	3.62132	0.476508	0.145687	0.263479
Ca(H2PO4)2	8.21	32.906	339.093	2.94711	0.56731	1132.59	48.3383	29.8089	0	57.6504	14.1965	115.06	597.721	5.19488	23.4305	37.9951	1.6216	315.499	1.85169	0.462449	-27.5285	-43.1029	26.1894	0	44.4984	5.18993	0.112119	0.178072	2.5609	0.0384723	0.0845017	0.305031	0.0989936	0.157225	2.2611	0.0339684	0.0746092	0.269321	821.561	0.773649	62.198	4.13032	36.3162	3.59226	0.181516	0.0924187	0.12952
Ca(H2PO4)2	8.12	32.6667	366.403	2.5802	0.51164	1117.86	30.6747	7.68	0	47.7698	17.3762	142.006	716.134	5.043	36.4423	145.554	3.99411	332.183	-0.704905	0.408056	-745.837	-36.3781	0.52902	0	33.3142	13.7375	0.0001	0.223442	1.2759	0.0438121	0.0554497	0.0150604	8.94568E-05	0.199884	1.14138	0.0391929	0.0496035	0.0134726	769.946	0.763949	199.91	5.29786	31.5645	3.45203	0.373844	0.17465	0.255522
Ca(H2PO4)2	8.11	33.3333	66.6667	2.99	0.514693	1168.59	51.4259	22.5	0	67.3275	13.05	22.2965	129.527	5.80928	22.7238	51.9374	2.2856	43.1814	0.621127	-0.0215855	10.1481	-17.3125	15.3509	0	46.5999	12.097	0.809779	0.146026	0.257732	0.0497815	0.0850434	0.146579	0.692952	0.124959	0.220549	0.0425995	0.0727742	0.125432	803.031	0.731705	25.7911	3.25003	26.7678	3.2872	0.540118	0.327151	0.420357
Ca(H2PO4)2	7.93	29.9213	89.8672	2.86725	0.290755	1118.04	57.66	28.5393	0	49.6085	5.56517	31.3426	309.082	9.86139	19.3902	39.1753	2.02037	66.3206	2.18845	0.0442527	12.6584	-3.82944	24.9835	0	36.1221	3.83355	0.00420957	0.170488	0.0001	0.00526197	0.0118394	0.0001	0.00376515	0.152488	8.94425E-05	0.00470643	0.0105895	8.94425E-05	724.332	0.715502	15.0894	2.71399	32.246	3.47339	0.471676	0.204102	0.310274
Ca(H2PO4)2	7.95	32.7078	81.5019	2.67688	0.97771	747.358	27.3544	11.53	0	31.6678	36.2226	30.4466	83.36	2.73791	27.3213	64.8185	2.37246	45.1719	1.90584	0.591221	85.6028	-35.9939	7.7946	-1.08092	18.7108	34.6966	0.00438389	0.151244	0.255336	0.0219194	0.0267143	0.0001	0.00586585	0.202372	0.341652	0.0293292	0.035745	0.000133805	786.988	1.16262	63.0608	4.1441	23.234	3.14562	0.539563	0.35633	0.438478
RNA	8.16	32.9167	41.0104	2.67329	0.693393	480.994	45.6775	29.8137	0	105.563	14.7953	15.3408	59.1444	3.85538	10.5302	16.1333	1.5321	17.4168	1.57788	0.588533	-679.126	-45.7637	26.1941	0	92.4107	5.78872	0.0461742	0.270449	0.0001	0.00274846	0.113374	0.373791	0.0959974	0.56227	0.000207903	0.00571413	0.235708	0.777122	880.545	2.01576	14.8189	2.6959	3.08105	1.12527	0.362435	0.0210993	0.0874478
RNA	8.2	33.0435	69.1659	2.28407	0.770641	446.946	52.5677	22.4026	0.309812	101.364	8.1792	30.2819	89.7512	2.96386	8.50228	19.9506	2.3465	34.9461	-1.00103	0.667057	-1416.75	-14.4851	15.2516	0.309812	86.9087	4.54043	0.0528704	0.21809	0.912413	0.00275367	0.0598923	0.24783	0.118293	0.487957	2.04144	0.00616107	0.134003	0.554497	869.831	2.16005	11.3459	2.42886	1.3209	0.278314	0.400532	0.0163862	0.0810135
RNA	8.16	32.1739	32.698	2.25479	0.934539	776.277	72.5348	40.5449	0	120.765	11.7458	14.5016	34.9884	2.41273	10.7021	19.1461	1.789	9.21269	-0.114087	0.39826	-382.167	3.79643	33.3958	0	100.037	10.7928	0.0391444	0.580643	0.0001	0.0001	0.0387367	0.358824	0.0504259	0.747984	0.00012882	0.00012882	0.0499006	0.462237	877.925	1.19839	3.09353	1.12931	1.08073	0.0776394	0.567389	0.0611769	0.186309
RNA	8.06	30.2752	52.8427	1.89507	0.509171	986.312	70.8252	46.6118	0	108.032	11.405	27.8843	103.782	3.72188	13.926	21.1601	1.51947	29.2962	1.21627	0.262668	-119.067	9.33576	43.056	0	94.5455	9.67342	0.0444249	0.0190392	0.657141	0.00528868	0.0297488	0.312032	0.0450414	0.0193035	0.666261	0.00536208	0.0301617	0.316362	831.947	0.881467	25.8821	3.25355	0.649056	-0.432236	0.276783	0.0856292	0.15395
RNA	7.98	33.9181	56.7646	1.7332	0.710668	672.566	50.5359	45.3982	0	75.5956	6.67978	32.7513	79.875	2.43884	13.3087	14.8148	1.11317	20.4346	0.962158	0.324179	10.8115	-12.8124	41.6628	-1.08092	62.6386	5.15377	0.0200888	0.220977	0.520026	0.00279011	0.0397591	0.23995	0.0298689	0.328558	0.773196	0.00414846	0.0591156	0.356768	856.556	1.36453	6.31597	1.84308	1.37841	0.320931	0.414527	0.034471	0.119537
AMP	8.14	32.9949	28.7209	1.01684	0	540.81	45.0491	26.1174	0	119.245	13.8733	28.2453	NA	NA	12.0049	20.7069	1.72487	5.12733	-0.0785764	NA	-619.31	-46.3921	22.4979	0	106.093	4.86669	0.0990602	0.224536	0.769291	0.0001	0.0474663	0.26416	0.18317	0.415185	1.42248	0.000184908	0.087769	0.488453	998.513	2.01074	0.000296431	-8.12369	115.202	4.74669	NA	0.00855752	NA
AMP	8.01	33.0357	31.725	0.384284	0.531356	522.114	37.278	26.1333	0	135.393	12.2919	82.5561	59.7058	0.723215	14.0059	19.9788	1.42646	-2.49479	-2.90082	0.427772	-1341.58	-29.7748	18.9824	0	120.938	8.65317	0.138769	0.231281	1.79611	0.00275335	0.175526	0.56719	0.265782	0.442971	3.44006	0.00527346	0.336183	1.08633	944.745	1.97699	0.000937859	-6.97191	134.214	4.89943	0.35072	0.00345023	0.034786
AMP	8.15	31.3901	18.721	0.281786	0.812619	917.695	58.2287	32.7941	0	158.629	7.96364	66.4368	23.0378	0.346763	15.7602	27.9835	1.77558	-4.76433	-2.08709	0.27634	-240.749	-10.5097	25.645	0	137.901	7.01068	0.0001	0.232184	0.0001	0.0001	0.0181393	0.0447885	0.000108969	0.253007	0.000108969	0.000108969	0.0197662	0.0488054	977.784	1.11809	0.000212489	-8.45662	9.26741	2.2265	0.58158	0.069866	0.201575
AMP	8.07	29.1667	29.051	0.656941	0.614416	916.497	53.8736	24.7059	0	137.986	9.75743	44.2216	47.2822	1.06921	17.012	37.0963	2.1806	5.50446	-0.021861	0.367914	-188.882	-7.61581	21.15	0	124.5	8.02581	0.0001	0.231142	0.242571	0.0001	0.0527098	0.0728827	0.000109111	0.252202	0.264672	0.000109111	0.0575123	0.0795232	898.171	1.02687	0.000839909	-7.08222	1472.73	7.29488	0.523463	0.000869752	0.0213374
AMP	8	33.5664	40.408	1.06171	0.944607	551.707	33.1715	26.3421	0	122.784	15.3879	38.0592	42.7775	1.12397	16.6319	20.9439	1.25926	4.078	0.290667	0.558118	-110.048	-30.1768	22.6067	-1.08092	109.827	13.8619	0.0199825	0.373006	0.517273	0.0001	0.106157	0.0832603	0.0362194	0.676095	0.937586	0.000181256	0.192415	0.150914	934.82	1.84343	0.000557478	-7.49209	35.9959	3.5834	0.470423	0.0371284	0.132159
Phytate	7.93	35.1145	62.5375	0.754149	0.751132	260.744	13.2998	3.98	0	67.8657	15.5404	82.9246	83.2577	1.00402	19.6052	65.5136	3.34165	38.944	-0.341266	0.646272	-899.376	-78.1414	0.360469	0	54.7137	6.5338	0.0045465	0.231871	0.0001	0.0454649	0.10869	0.261423	0.0174366	0.889268	0.000383518	0.174366	0.416844	1.00261	804.709	3.74144	0.00549811	-5.20335	31.6824	3.45576	0.46431	0.0979963	0.213309
Phytate	8.28	34.8958	56.5931	0.493568	0.120964	347.25	44.3923	7.9	0	62.5997	10.4172	114.661	467.851	4.0803	7.8223	43.9557	5.61928	22.3732	-2.79154	0.0173795	-1516.45	-22.6606	0.74902	0	48.1441	6.77843	0.00453122	0.237889	0.0001	0.0339842	0.0403562	0.0849605	0.0130489	0.685066	0.000287977	0.0978666	0.116217	0.244667	811.565	2.68962	0.0013203	-6.6299	6.13973	1.81478	0.319825	0.0623539	0.141217
Phytate	8.01	32.9545	78.2222	0.777582	0.613132	869.725	83.5254	14.9153	0	73.2936	8.84615	100.597	127.578	1.26821	10.4127	58.3111	5.6	54.7369	-1.59129	0.076853	-288.719	14.787	7.76614	0	52.5659	7.8932	0.0924005	0.237601	0.768828	0.0001	0.0763129	0.533503	0.106241	0.273191	0.883989	0.000114979	0.0877437	0.613416	786.388	0.952586	0.0024505	-6.01146	105.594	4.65961	0.479257	0.00806198	0.0621592
Phytate	8.09	31.6092	73.5641	0.797378	0	928.433	67.784	14.6218	0	53.7353	7.8523	92.2575	NA	NA	13.6969	63.4963	4.6358	50.0176	0.118576	NA	-176.945	6.29455	11.066	0	40.2489	6.12068	0.064702	0.187636	0.0001	0.0001	0.0222413	0.291159	0.0696895	0.2021	0.000107708	0.000107708	0.0239558	0.313603	807.112	0.911878	0.00100752	-6.90026	49.7144	3.90629	NA	0.0310527	NA
Phytate	8.08	33.7553	50.9894	0.617911	0.546371	648.102	40.3293	11.3217	0	33.9499	11.5765	82.519	93.3238	1.13094	16.0702	57.2444	3.56214	14.6594	-0.153135	0.159882	-13.653	-23.019	7.58626	-1.08092	20.9928	10.0505	0.0333991	0.227114	1.03749	0.0361823	0.00834977	0.339557	0.0515337	0.350429	1.60082	0.0558281	0.0128834	0.523925	804.38	1.33315	0.000321406	-8.04281	2.38256	0.868176	0.58532	0.382033	0.472876
Pre-incubation
Sample	pH	moisture (%)	TOC	TN	TP	DOC	DON	DOP	NH4	NO3	HPO4	Cmic	Nmic	Pmic	Phm	Phd	phytase	NAG	BG	POX	DOC:DON	DOC:DOP	Cmic:Nmic	Cmic:Pmic	Nmic:Pmic
A1	8.12	29	30.29	2.81	0.62	23.59	1.1	0.1	0	13.15	9.01	1160.12	91.44	3.62	0.0770595	0.196151	0	0.0175135	0	0.148865	21.5385	225	12.6871	320.517	25.2633
A2	8.04	28	23.26	3.01	0.76	34.22	3.29	0.1	0	14.46	3.64	1863.7	67.05	7.15	0.0477415	0.0954831	0	0.00568352	0	0.255758	10.4167	330.357	27.7944	260.621	9.37674
A3	8.04	28	25.72	2.45	0.51	23.49	2.37	0.54	0	20.73	0.95	1158.44	68.74	7.15	0	0.23215	0	0.00386917	0.0116075	0.32501	9.91413	43.7931	16.8529	162.04	9.61495
A4	8.07	28	26.43	2.17	0.54	23.55	0.68	0.25	0	13.49	1.73	1105.38	61.49	3.56	0.022997	0.233803	0	0.0127761	0.0095821	0.0574926	34.6883	95.5224	17.9767	310.86	17.2924
A5	8.11	31	23.92	2.53	0.58	36.33	0.77	0.39	1.08	12.96	1.53	661.75	63.35	3.74	0	0.0286202	0.277827	0.00198752	0.00447191	0.192292	47.1178	94	10.4463	177.158	16.9589
ABBREVIATIONS
DOC	Dissolved organic Carbon
DON	Dissolved organic nitrogen
DOP	Dissolved organic phophorus
Cmic	Carbon immobilized in microbial biomass
Nmic	Nitrogen immobilized in microbial biomass
Pmic	Phosphorus immobilized in microbial biomass
NH4	available ammonium
NO3	available nitrate
HPO4	available phosphate
dDOC	Difference in dissolved organic carbon between post and pre incubation
dDON	Difference in dissolved organic nitrogen between post and pre incubation
dDOP	Difference in dissolved organic phosphorus between post and pre incubation
dCMIC	Difference in carbon immobilized in microbial biomass between post and pre incubation
dNMIC	Difference in nitrogen immobilized in microbial biomass between post and pre incubation
dPMIC	Difference in phosphorus immobilized in microbial biomass between post and pre incubation
dNH4	Difference in ammonium between post and pre incubation
dNO3	Difference in nitrate between post and pre incubation
dPO4	Difference in orthophosphate between post and pre incubation
Phm	Phosphomonoesterase enzyme activity
Phd	Phosphodiesterase enzyme activity
phytase	Phytase enzyme activity
NAG	N-acetyl glucosaminidase enzyme activity
BG	B-glucosidase enzyme activity
POX	Polyphenol oxidase (Laccase) enzyme activity
SEA	specific enzyme activity
CO2-C	Carbon from CO2 produced in mineralization;
qCO2	Metabolic quotient
TER C:P	threshold element ratio for C:P
lnTER C:P	natural logaritm of the threshold element ratio for C:P
TER C:N	threshold element ratio for C:N
lnTER C:N	natural logaritm of the threshold element ratio for C:N
CUE C:P	Carbon use efficiency related to C:P
CUE C:N	Carbon use efficiency related to C:N
CUE	Carbon use efficiency of the microbial community
TOC	Total organic carbon
TN	Total nitrogen
TP	Total phosphorus
MAP	Mono-ammonium phosphate treatment
Ca(H2PO4)2	Calcium phosphate treatment
RNA	Ribonucleic acid treatment
AMP	Adenosine monophosphate treatment
